# Supplementary material for: Progressive Vertical and Horizontal Phytocompound Changes during Agarwood Formation in Aquilaria sinensis after Geotrichum candidum Injection
Source: MDPI journal article supplement (doi:10.3390/life13112147), 2023-10-31
Supplement: s1 [file s1]

# Supplimentary files

**Table S1. GC/MS analysis of compound changes among horizontal color parts**

| Sesquiterpene                                                                       |           |                                                                                                                         |        |      |      |      |      |
|-------------------------------------------------------------------------------------|-----------|-------------------------------------------------------------------------------------------------------------------------|--------|------|------|------|------|
| Structure                                                                           | Formula   | Compound name                                                                                                           | RT     | N    | W    | BR   | B    |
|    | C15H26O   | 3,7-Cyclodecadiene-1-methanol, .alpha.,.alpha.,4,8-tetramethyl-, [s-(Z,Z)] \$\$ Hedycaryol                              | 11.092 | 0.00 | 0.00 | 0.01 | 0.00 |
|    | C15H24O   | Lanceol, cis                                                                                                            | 11.425 | 0.00 | 0.00 | 0.05 | 0.00 |
|    | C15H24    | 1H-Cycloprop[e]azulene, decahydro-1,1,7-trimethyl-4-methylene-, [1aR-(1a.alpha.,4a.alpha.,7.alpha.,7a.beta.,7b.alpha.)] | 12.092 | 0.00 | 0.00 | 0.10 | 0.00 |
|    | C15H26O   | 2-Naphthalenemethanol, decahydro-.alpha.,.alpha.,4a-trimethyl-8-methylene-, [2R-(2.alpha.,4a.alpha.,8a.beta.)]          | 12.267 | 0.00 | 0.01 | 0.31 | 0.00 |
|    | C15H24    | Humulene                                                                                                                | 12.875 | 0.00 | 0.00 | 0.12 | 0.00 |
|    | C15H28O2  | (1R,4aR,7R,8aR)-7-(2-Hydroxypropan-2-yl)-1,4a-dimethyldecahydronaphthalen-1-ol                                          | 13.858 | 0.00 | 0.00 | 0.12 | 0.05 |
|   | C15H24O   | Tricyclo[4.4.0.0(2,7)]dec-8-ene-3-methanol, .alpha.,.alpha.,6,8-tetramethyl-, stereoisomer                              | 15.208 | 0.00 | 0.00 | 0.13 | 0.00 |
|  | C15H26O   | Cyclohexanemethanol, 4-ethenyl-.alpha.,.alpha.,4-trimethyl-3-(1-methylethenyl)-, [1R-(1.alpha.,3.alpha.,4.beta.)]       | 15.742 | 0.00 | 0.00 | 0.23 | 0.02 |
|  | C15H26O   | 6-(1-Hydroxymethylvinyl)-4,8a-dimethyl-3,5,6,7,8,8a-hexahydro-1H-naphthalen-2-one                                       | 16.433 | 0.00 | 0.00 | 0.08 | 0.00 |
|  | C15H24    | Azulene, 1,2,3,4,5,6,7,8-octahydro-1,4-dimethyl-7-(1-methylethenyl)-, [1S-(1.alpha.,4.alpha.,7.alpha.)]                 | 16.942 | 0.00 | 0.00 | 0.17 | 0.01 |
|  | C15H24    | epi-.alpha.-Patchoulene                                                                                                 | 17.108 | 0.00 | 0.00 | 0.16 | 0.00 |
|  | C15H20O2  | Germacre-1(10),4,11(13)-trien-12-oic acid, 6.alpha.-hydroxy-, .gamma.-lactone, (E,E)-                                   | 17.567 | 0.00 | 0.00 | 0.04 | 0.00 |
|  | C15H13IO2 | 2-Iodophenyl-.beta.-phenylpropionate                                                                                    | 20.425 | 0.00 | 0.00 | 0.05 | 0.00 |
| TOTAL                                                                               |           |                                                                                                                         |        | 0.00 | 0.01 | 1.57 | 0.07 |
|                                                                                     |           |                                                                                                                         |        | 1.65 |      |      |      |

| Chromone  |          |                                                                                                                   |        |      |      |      |      |
|-----------|----------|-------------------------------------------------------------------------------------------------------------------|--------|------|------|------|------|
| Structure | Formula  | Compound name                                                                                                     | RT     | N    | W    | BW   | B    |
|           | C10H8O2  | 4+AJ21:AJ44H-1-Benzopyran-4-one, 2-methyl-                                                                        | 10.9   | 0.00 | 0.00 | 0.05 | 0.00 |
|           | C10H8O2  | 4H-1-Benzopyran-4-one, 2-methyl-                                                                                  | 10.9   | 0.00 | 0.00 | 0.00 | 0.02 |
|           | C11H10O3 | 6-Methoxy-3-methyl-2-benzofurancarbaldehyde                                                                       | 20.742 | 0.22 | 0.00 | 0.00 | 0.03 |
|           | C17H24O4 | 2-Hydroxy-4-methoxy-7-methyl-7,8,9,10,11,12,13,14-octahydro-6-oxabenzocyclododecen-5-one                          | 22.817 | 0.00 | 0.00 | 0.04 | 0.74 |
|           | C16H14O4 | 7H-Furo[3,2-g][1]benzopyran-7-one, 9-[(3-methyl-2-butenyl)oxy]-                                                   | 23.483 | 0.11 | 0.00 | 0.00 | 0.02 |
|           | C18H16O3 | 6-Methoxy-2-phenethyl-4H-chromen-4-one                                                                            | 24.008 | 0.00 | 0.00 | 0.74 | 0.08 |
|           | C18H18O3 | Coumarin, 6-benzoyloxy-3,4-dihydro-4,4-dimethyl-                                                                  | 24.375 | 0.00 | 0.48 | 1.26 | 0.50 |
|           | C17H14O5 | 4H-1-Benzopyran-4-one, 5-hydroxy-7-methoxy-2-(4-methoxyphenyl)-                                                   | 26.342 | 0.62 | 1.41 | 0.00 | 0.16 |
|           | C16H12O5 | Genkwanin                                                                                                         | 27.017 | 0.00 | 0.42 | 0.00 | 0.00 |
| TOTAL     |          |                                                                                                                   |        | 0.96 | 2.31 | 2.09 | 1.55 |
|           |          |                                                                                                                   |        | 6.91 |      |      |      |
| Terpenoid |          |                                                                                                                   |        |      |      |      |      |
| Structure | Formula  | Compounds                                                                                                         | RT     | N    | W    | BW   | B    |
|           | C10H12O  | 2-Butanone, 4-phenyl-                                                                                             | 8      | 0.00 | 0.04 | 0.41 | 0.00 |
|           | C10H16O2 | 2H-Pyran-2-one, 5,6-dihydro-6-pentyl                                                                              | 8.267  | 0.00 | 0.00 | 0.00 | 0.48 |
|           | C10H12O2 | Benzenepropanoic acid, methyl ester                                                                               | 8.333  | 0.00 | 0.00 | 0.07 | 0.00 |
|           | C9H10O2  | 2-Methoxy-4-vinylphenol                                                                                           | 8.767  | 0.00 | 0.05 | 0.00 | 0.00 |
|           | C10H10O4 | Benzylmalonic acid                                                                                                | 8.9    | 0.00 | 0.00 | 0.06 | 0.06 |
|           | C10H18O3 | 2H-Pyran-2-one, tetrahydro-4-hydroxy-6-pentyl-                                                                    | 10.55  | 0.00 | 0.00 | 0.00 | 0.51 |
|           | C10H12O3 | 3-(4-Methoxyphenyl)propionic acid                                                                                 | 11.258 | 0.00 | 0.00 | 0.12 | 0.00 |
|           | C10H12O3 | 4-((1E)-3-Hydroxy-1-propenyl)-2-methoxyphenol                                                                     | 13.1   | 0.43 | 0.90 | 0.26 | 0.13 |
|           | C20H28O2 | Androsta-1,4-dien-3-one, 17-hydroxy-17-methyl-, (17.alpha.)-                                                      | 14.3   | 0.00 | 0.00 | 0.16 | 0.00 |
|           | C20H28O6 | 1H-2,8a-Methanocyclopenta[a]cyclopropa[e]cyclodecen-11-one, 1a,2,5,5a,6,9,10,10a-octahydro-5,5a,6-trihydroxy-1,4- | 16.95  | 0.00 | 0.00 | 0.68 | 0.06 |
| TOTAL     |          |                                                                                                                   |        | 0.43 | 0.99 | 1.76 | 1.24 |
|           |          |                                                                                                                   |        | 4.42 |      |      |      |

| Alkaloid  |             |                                                                                 |        |        |      |      |      |
|-----------|-------------|---------------------------------------------------------------------------------|--------|--------|------|------|------|
| Structure | Formula     | Compounds                                                                       | RT     | N      | W    | BW   | B    |
|           | C7H9NO      | 4(H)-Pyridine, N-acetyl-                                                        | 5.292  | 0.00   | 0.02 | 0.00 | 0.00 |
|           | C6H9NO3     | DL-Proline, 5-oxo-, methyl ester                                                | 9.333  | 0.08   | 0.00 | 0.00 | 0.00 |
|           | C5H9NO3     | Pyrrolidin-4-ol-2-carboxylic acid                                               | 9.458  | 0.00   | 0.00 | 0.00 | 0.43 |
|           | C13H21NO2   | 2,5-Dimethoxy-4-ethylamphetamine                                                | 11.158 | 0.03   | 0.13 | 0.06 | 0.00 |
|           | C29H41NO3   | N-Acetyl-veratramine                                                            | 11.775 | 0.00   | 0.41 | 0.00 | 0.00 |
|           | C8H16N2O7   | beta-D-glucosyloxyazoxymethane                                                  | 17.283 | 0.00   | 0.00 | 1.28 | 0.00 |
|           | C18H17N3O3  | Oxalic acid, monoamide monohydrazide, N-benzyl-N''-(1-oxo-3-phenylprop-2-enyl)- | 17.667 | 0.00   | 0.00 | 0.31 | 0.00 |
|           | C18H27NO3   | Capsaicin                                                                       | 23.575 | 4.1006 | 0.00 | 0.00 | 0.00 |
|           | C17H27NO3   | Nonivamide                                                                      | 23.75  | 0.38   | 0.00 | 0.00 | 0.00 |
|           | C14H14Cl2N2 | 2,6-Lutidine-4-[benzylamino]-3,5-dichloro                                       | 23.967 | 0.00   | 0.65 | 1.19 | 0.54 |
|           | C15H13NO4   | benzene-1,2-diol, 4-[2-nitroethenyl]-, 1-O-benzyl(ether)                        | 24.225 | 0.00   | 0.00 | 0.45 | 0.00 |
|           | C20H25NO    | Pentanal, 2-[bis(phenylmethyl)amino]-4-methyl-                                  | 24.725 | 0.04   | 1.16 | 1.00 | 4.57 |
|           | C23H23NO    | Benzenepropanal, .alpha.-[bis(phenylmethyl)amino]-                              | 25.658 | 0.00   | 1.16 | 0.87 | 0.40 |
|           | C17H14N2O4  | 5-Benzyloxy-6-methoxy08nitroquinoline                                           | 25.825 | 0.00   | 2.20 | 0.00 | 1.07 |
|           | C17H16N2O2S | Quinazolin-4(3H)-one, 2-(4-methoxybenzylthio)-3-methyl                          | 26.075 | 0.00   | 0.61 | 0.00 | 0.13 |
|           | C14H12ClNO4 | Benzene, 1-chloro-4-(4-methoxybenzyloxy)-3-nitro-                               | 26.533 | 0.00   | 0.92 | 0.00 | 0.00 |
|           | C15H12F3NO4 | Benzene, 1-trifluoromethyl-4-(3-methoxybenzyloxy)-3-nitro-                      | 27.733 | 0.00   | 0.76 | 0.00 | 0.00 |
| TOTAL     |             |                                                                                 |        | 4.63   | 8.02 | 5.15 | 7.13 |
|           |             |                                                                                 |        | 24.93  |      |      |      |

| Aromatic compound                                                                   |          |                                                                            |        |      |      |      |      |
|-------------------------------------------------------------------------------------|----------|----------------------------------------------------------------------------|--------|------|------|------|------|
| Structure                                                                           | Formula  | Compound                                                                   | RT     | N    | W    | BW   | B    |
| 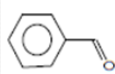   | C7H6O    | Benzaldehyde                                                               | 4.592  | 0.00 | 0.04 | 0.27 | 0.06 |
|    | C10H12O  | 2-Butanone, 4-phenyl-                                                      | 8.008  | 0.00 | 0.05 | 0.00 | 0.00 |
|    | C9H10O2  | 2-Methoxy-4-vinylphenol                                                    | 8.767  | 0.05 | 0.10 | 0.00 | 0.00 |
|    | C9H10O2  | Hydrocinnamic acid                                                         | 8.908  | 0.00 | 0.00 | 0.24 | 0.00 |
|    | C8H10O3  | Phenol, 2,6-dimethoxy-                                                     | 9.125  | 0.06 | 0.09 | 0.00 | 0.00 |
|    | C8H8O3   | Vanillin                                                                   | 9.633  | 0.00 | 0.06 | 0.00 | 0.00 |
|    | C8H10O3  | 4-Hydroxy-3-methoxybenzyl alcohol                                          | 10.117 | 0.00 | 0.05 | 0.00 | 0.00 |
|   | C11H14O2 | 2-Butanone, 4-(4-methoxyphenyl)-                                           | 10.558 | 0.00 | 0.00 | 0.07 | 0.00 |
|  | C14H22O  | 2,4-Di-tert-butylphenol                                                    | 10.625 | 0.00 | 0.00 | 0.05 | 0.00 |
|  | C14H22O  | Phenol, 2,4-bis(1,1-dimethylethyl)-                                        | 10.625 | 0.09 | 0.09 | 0.08 | 0.11 |
|  | C18H28O3 | Benzenepropanoic acid, 3,5-bis(1,1-dimethylethyl)-4-hydroxy-, methyl ester | 10.808 | 0.00 | 0.00 | 0.03 | 0.00 |
|  | C13H18O3 | 3-tert-Butyl-4-hydroxyanisole, acetate                                     | 11.158 | 0.00 | 0.08 | 0.05 | 0.00 |
|  | C9H12O4  | Phenol, 3,4,5-trimethoxy-                                                  | 11.5   | 0.13 | 0.15 | 0.00 | 0.00 |
|  | C9H10O4  | Benzaldehyde, 4-hydroxy-3,5-dimethoxy-                                     | 12.167 | 0.04 | 0.09 | 0.00 | 0.00 |
|  | C9H10O2  | Hydrocinnamic acid                                                         | 17.642 | 0.00 | 0.00 | 0.26 | 0.00 |

|       |             |                                                              |        |       |      |      |      |
|-------|-------------|--------------------------------------------------------------|--------|-------|------|------|------|
|       | C17H16O     | 1-Penten-3-one, 1,5-diphenyl-                                | 19.292 | 0.00  | 0.07 | 0.26 | 0.00 |
|       | C17H27NO3   | Nonivamide                                                   | 19.642 | 0.00  | 0.27 | 0.00 | 0.00 |
|       | C15H13IO2   | 2-Iodophenyl-.beta.-phenylpropionate                         | 20.417 | 0.00  | 0.00 | 0.20 | 0.20 |
|       | C17H18O     | 3-Pentanone, 1,5-diphenyl-                                   | 20.433 | 0.00  | 0.00 | 0.39 | 0.23 |
|       | C17H14O2    | 8-Naphthol, 1-(benzyloxy)-                                   | 21.542 | 0.00  | 0.68 | 0.71 | 0.79 |
|       | C24H38O4    | 1,2-Benzenedicarboxylic acid, diisooctyl ester               | 23.425 | 0.05  | 0.00 | 0.12 | 0.06 |
|       | C20H25NO    | Pentanal, 2-[bis(phenylmethyl)amino]-4-methyl-               | 24.717 | 0.00  | 0.85 | 0.00 | 0.00 |
|       | C23H23NO    | Benzenepropanal, alpha-[bis(phenylmethyl)amino]-             | 25.658 | 0.00  | 0.48 | 0.00 | 0.00 |
|       | C8H10S2     | Benzyl methyl disulfide                                      | 25.667 | 0.00  | 1.13 | 0.00 | 0.00 |
|       | C13H18O2    | p-(Pentyloxy)acetophenone                                    | 26.9   | 0.00  | 0.45 | 0.00 | 0.00 |
|       | C15H12F3NO4 | Benzene, 1-(trifluoromethyl)-4-(3-methoxybenzyloxy)-3-nitro- | 27.725 | 0.00  | 0.51 | 0.00 | 0.00 |
| TOTAL |             |                                                              |        | 0.41  | 5.25 | 2.72 | 1.45 |
|       |             |                                                              |        | 10.33 |      |      |      |

| Fatty acid                                                                          |           |                                                           |        |       |      |      |      |
|-------------------------------------------------------------------------------------|-----------|-----------------------------------------------------------|--------|-------|------|------|------|
| Structure                                                                           | Formula   | Compound                                                  | RT     | N     | W    | BW   | B    |
|                                                                                     | C19H36O2  | 11-Octadecenoic acid, methyl ester                        | 18.333 | 0.13  | 0.25 | 0.43 | 0.35 |
| 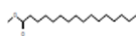   | C17H34O2  | Hexadecanoic acid, methyl ester                           | 16.017 | 0.13  | 0.12 | 0.25 | 0.18 |
|    | C16H32O2  | n-Hexadecanoic acid                                       | 16.575 | 0.13  | 0.72 | 1.03 | 0.83 |
|    | C22H34O2  | Ethyl 5,8,11,14,17-icosapentaenoate                       | 17.925 | 0.00  | 0.00 | 0.21 | 0.00 |
|    | C16H32O2  | 1-Heptadecanol                                            | 18.133 | 0.00  | 0.00 | 0.00 | 0.05 |
|    | C19H34O2  | 9,12-Octadecadienoic acid (Z,Z)-, methyl ester            | 18.283 | 0.00  | 0.00 | 0.31 | 0.14 |
|    | C20H36O2  | Linoleic acid ethyl ester                                 | 18.283 | 0.06  | 0.11 | 0.00 | 0.00 |
|    | C19H38O2  | Octadecanoic acid, methyl ester                           | 18.6   | 0.00  | 0.00 | 0.05 | 0.08 |
|   | C19H34O2  | 9,12-Octadecadienoic acid (Z,Z)-                          | 18.692 | 0.00  | 0.00 | 0.00 | 0.23 |
|  | C18H34O2  | Oleic Acid                                                | 18.75  | 0.02  | 1.75 | 0.29 | 0.79 |
|  | C19H38O2  | Octadecanoic acid                                         | 18.983 | 0.00  | 0.30 | 0.00 | 0.15 |
|  | C15H30O   | Pentadecanal                                              | 22.292 | 0.00  | 0.00 | 0.00 | 0.04 |
|  | C19H38O4  | Hexadecanoic acid, 2-hydroxy-1-(hydroxymethyl)ethyl ester | 23.067 | 0.07  | 0.13 | 0.06 | 0.12 |
|  | C18H33ClO | Oleoyl chloride                                           | 24.458 | 0.00  | 0.00 | 0.00 | 0.53 |
|  | C21H40O4  | 9-Octadecenoic acid (Z)-, 2,3-dihydroxypropyl ester       | 24.467 | 0.00  | 0.19 | 0.41 | 0.00 |
|  | C21H34O2  | Methyl (Z)-5,11,14,17-eicosatetraenoate                   | 24.517 | 0.00  | 0.59 | 0.00 | 0.00 |
|  | C27H54O2  | Hexacosanoic acid                                         | 25.925 | 0.00  | 0.00 | 0.00 | 0.16 |
| TOTAL                                                                               |           |                                                           |        | 0.55  | 4.16 | 3.04 | 3.65 |
|                                                                                     |           |                                                           |        | 11.40 |      |      |      |

| Other                                                                               |                                                 |                                                                                            |        |      |      |      |      |
|-------------------------------------------------------------------------------------|-------------------------------------------------|--------------------------------------------------------------------------------------------|--------|------|------|------|------|
| Structure                                                                           | Formula                                         | Compound name                                                                              | RT     | N    | W    | BW   | B    |
|    | C <sub>5</sub> H <sub>8</sub> O <sub>4</sub>    | Propanedioic acid, dimethyl ester                                                          | 4.067  | 0.00 | 0.06 | 0.00 | 0.00 |
|    | C <sub>5</sub> H <sub>6</sub> O <sub>2</sub>    | 1,2-Cyclopentanedione                                                                      | 4.092  | 0.00 | 0.04 | 0.00 | 0.00 |
|    | C <sub>5</sub> H <sub>6</sub> O <sub>2</sub>    | 2(3H)-Furanone, 5-methyl-                                                                  | 4.1    | 0.00 | 0.05 | 0.00 | 0.00 |
|    | C <sub>4</sub> H <sub>7</sub> FO <sub>2</sub>   | Acetic acid, fluoro-, ethyl ester                                                          | 4.6    | 0.00 | 0.00 | 0.00 | 0.11 |
|    | C <sub>4</sub> H <sub>10</sub> N <sub>2</sub> O | 2-Propanamine, N-methyl-N-nitroso-                                                         | 6.708  | 0.03 | 0.00 | 0.00 | 0.00 |
|    | C <sub>6</sub> H <sub>8</sub> O <sub>4</sub>    | 4H-Pyran-4-one, 2,3-dihydro-3,5-dihydroxy-6-methyl-                                        | 6.858  | 0.05 | 0.00 | 0.00 | 0.00 |
|   | C <sub>9</sub> H <sub>16</sub> O                | trans-2-Oxabicyclo[4.4.0]decane                                                            | 7.625  | 0.00 | 0.00 | 0.00 | 0.06 |
|  | C <sub>8</sub> H <sub>14</sub> O <sub>5</sub>   | 3-Hydroxy-2-methylglutaric acid dimethyl ester                                             | 7.708  | 0.00 | 0.08 | 0.26 | 0.00 |
|  | C <sub>7</sub> H <sub>12</sub> O                | 3-Hexen-2-one, 5-methyl-                                                                   | 8.008  | 0.00 | 0.00 | 0.00 | 0.15 |
|  | C <sub>9</sub> H <sub>10</sub> O <sub>2</sub>   | Hydrocinnamic acid                                                                         | 8.9    | 0.00 | 0.00 | 0.00 | 0.04 |
|  | C <sub>7</sub> H <sub>12</sub> O <sub>3</sub>   | 5-Hydroxy-hex-2-enoic acid, methyl ester                                                   | 9.075  | 0.00 | 0.00 | 0.00 | 0.04 |
|  | C <sub>8</sub> H <sub>16</sub>                  | 2-Pentene, 2,4,4-trimethyl-                                                                | 9.2    | 0.15 | 0.00 | 0.00 | 0.00 |
|  | C <sub>13</sub> H <sub>28</sub>                 | Tridecane                                                                                  | 9.533  | 0.00 | 0.00 | 0.00 | 0.04 |
|  | C <sub>4</sub> H <sub>9</sub> NO <sub>5</sub>   | 1,3-Propanediol, 2-(hydroxymethyl)-2-nitro-                                                | 10.058 | 1.19 | 0.42 | 0.00 | 0.00 |
|  | C <sub>18</sub> H <sub>32</sub> O <sub>16</sub> | alpha.-D-Glucopyranoside, O-.alpha.-D-glucopyranosyl-(1.fwdarw.3)-.beta.-D-fructofuranosyl | 10.375 | 0.00 | 0.00 | 0.00 | 0.08 |

|                                                                                     |             |                                                                    |        |      |       |      |      |
|-------------------------------------------------------------------------------------|-------------|--------------------------------------------------------------------|--------|------|-------|------|------|
|    | C6H12O6     | D-Allose                                                           | 10.392 | 0.00 | 0.22  | 0.07 | 0.00 |
|    | C6H10O5     | 1,6-Anhydro- beta- -D-glucopyranose (levoglucosan)                 | 10.417 | 0.00 | 0.29  | 0.00 | 0.00 |
|    | C9H17NO     | 7-Nonenamide                                                       | 10.517 | 0.02 | 0.00  | 0.00 | 0.00 |
|    | C15H24O     | Santalol                                                           | 11.417 | 0.00 | 0.00  | 0.04 | 0.00 |
|    | C15H24      | alpha- -Farnesene                                                  | 11.433 | 0.00 | 0.00  | 0.20 | 0.00 |
|    | C6H10O5     | 3-Deoxy-d-mannioic lactone                                         | 11.642 | 0.00 | 0.26  | 0.00 | 0.00 |
|    | C6H12O4     | 1,2,3,5-Cyclohexanetetrol,<br>(1.alpha.,2.beta.,3.alpha.,5.beta.)- | 11.667 | 0.25 | 0.28  | 0.00 | 0.00 |
|    | C8H16O6     | Ethyl alpha.-d-glucopyranoside                                     | 11.85  | 0.00 | 4.57  | 0.00 | 0.08 |
|   | C16H48O8Si8 | Cyclooctasiloxane, hexadecamethyl                                  | 12.075 | 0.21 | 0.00  | 0.00 | 0.00 |
|  | C7H14O6     | beta.-D-Glucopyranoside, methyl                                    | 13.192 | 0.00 | 0.21  | 0.00 | 0.00 |
|  | C12H18      | 1-(3-Methyl-cyclopent-2-enyl)-cyclohexene                          | 15.217 | 0.00 | 0.00  | 0.09 | 0.00 |
|  | C12H22O11   | alpha.-D-Glucopyranoside, .alpha.-D-glucopyranosyl                 | 16.575 | 0.00 | 9.46  | 0.74 | 0.00 |
|  | C6H12O6     | D-Galactose                                                        | 16.625 | 0.00 | 0.00  | 1.24 | 0.00 |
|  | C21H34O2    | Androstan-17-one, 3-ethyl-3-hydroxy-, (5.alpha.)-                  | 16.967 | 0.00 | 0.00  | 0.47 | 0.15 |
|  | C6H8O6      | D-Glucurono-6,3-lactone                                            | 17.033 | 0.00 | 13.64 | 0.00 | 0.00 |
|  | C6H12O6     | Glucose                                                            | 17.867 | 0.00 | 0.10  | 0.00 | 0.00 |
|  | C20H42O     | 1-Eicosanol                                                        | 18.133 | 0.00 | 0.00  | 0.00 | 0.04 |



|                                                                                     |               |                                                                                                           |        |       |       |      |      |
|-------------------------------------------------------------------------------------|---------------|-----------------------------------------------------------------------------------------------------------|--------|-------|-------|------|------|
|    | C16H24        | 1,3-Di(propen-1-yl)adamantane                                                                             | 18.142 | 0.00  | 0.00  | 0.32 | 0.00 |
|    | C25H50Br2     | erythro-9,10-Dibromopentacosane                                                                           | 18.15  | 0.02  | 0.00  | 0.00 | 0.00 |
|    | C16H30O       | Z,Z-8,10-Hexadecadien-1-ol                                                                                | 18.283 | 0.00  | 0.25  | 0.00 | 0.00 |
|    | C17H30O       | 3-Phenanthrenol, tetradecahydro-4b,8,8-trimethyl-, [3S-(3.alpha.,4a.beta.,4b.alpha.,8a.beta.,10a.alpha.)] | 19.725 | 0.00  | 0.00  | 0.00 | 0.07 |
|    | C18H54O9Si9   | Cyclononasiloxane, octadecamethyl-                                                                        | 23.508 | 0.00  | 0.00  | 0.12 | 0.00 |
|    | C29H48O       | Stigmast-4-en-3-one                                                                                       | 23.55  | 0.00  | 0.36  | 0.00 | 0.00 |
|    | C30H50        | 2,6,10,14,18,22-Tetracosahexaene, 2,6,10,15,19,23-hexamethyl-, (all-E)-                                   | 24.058 | 0.00  | 0.25  | 0.00 | 0.00 |
|    | C18H33ClO     | 9-Octadecenoyl chloride                                                                                   | 24.467 | 0.21  | 0.00  | 0.00 | 0.00 |
|  | C18H33ClO     | Oleoyl chloride                                                                                           | 24.467 | 0.00  | 0.56  | 0.00 | 0.72 |
|  | C18H33ClO     | Oleoyl chloride                                                                                           | 24.467 | 0.00  | 0.00  | 0.00 | 0.00 |
|  | C29H46O       | Spinasterone                                                                                              | 24.892 | 0.00  | 0.65  | 0.00 | 0.00 |
|  | C30H50O       | 1,6,10,14,18,22-Tetracosahexaen-3-ol, 2,6,10,15,19,23-hexamethyl-, (all-E)-                               | 25.342 | 0.00  | 0.16  | 0.00 | 0.00 |
|  | C20H60O10Si10 | Cyclodecasiloxane, eicosamethyl-                                                                          | 26.208 | 0.00  | 0.00  | 0.00 | 0.10 |
|  | C29H48O       | Stigmasta-5,22-dien-3-ol, (3.beta.,22E)-                                                                  | 29.017 | 0.12  | 0.64  | 0.00 | 0.28 |
| TOTAL                                                                               |               |                                                                                                           |        | 2.26  | 32.56 | 3.56 | 1.97 |
|                                                                                     |               |                                                                                                           |        | 40.35 |       |      |      |

**Table S2. GC/MS analysis of vertical compound change in brown part of agarwood**  
**Sesquiterpenes**

| Compound name                                                                                                               | RT     | L1   | L2   | L3   | L4    | L5   | L6   |
|-----------------------------------------------------------------------------------------------------------------------------|--------|------|------|------|-------|------|------|
| 3,7-Cyclodecadiene-1-methanol, .alpha.,.alpha.,4,8-tetramethyl-, [s-(Z,Z)] \$\$ Hedycaryol                                  | 11.092 | 0.00 | 0.00 | 0.00 | 0.00  | 0.09 | 0.00 |
| Lanceol, cis                                                                                                                | 11.425 | 0.05 | 0.06 | 0.05 | 0.00  | 0.29 | 0.00 |
| 1H-Cycloprop[e]azulene, decahydro-1,1,7-trimethyl-4-methylene-, [1aR-(1a.alpha.,4a.alpha.,7a.alpha.,7a.beta.,7b.alpha.)]    | 12.092 | 0.00 | 0.00 | 0.00 | 0.00  | 0.36 | 0.49 |
| Azulene, 1,2,3,4,5,6,7,8-octahydro-1,4-dimethyl-7-(1-methylethylidene)-, (1S-cis)-                                          | 12.1   | 0.10 | 0.14 | 0.05 | 0.06  | 0.54 | 0.51 |
| 2-Naphthalenemethanol, decahydro-.alpha.,.alpha.,4a-trimethyl-8-methylene-, [2R-(2.alpha.,4a.alpha.,8a.beta.)]-             | 12.267 | 0.25 | 0.39 | 0.25 | 0.32  | 0.70 | 0.72 |
| Humulene                                                                                                                    | 12.875 | 0.10 | 0.12 | 0.09 | 0.12  | 0.30 | 0.30 |
| (1R,4aR,7R,8aR)-7-(2-Hydroxypropan-2-yl)-1,4a-dimethyldecahydronaphthalen-1-ol                                              | 13.858 | 0.12 | 0.13 | 0.11 | 0.10  | 0.22 | 0.30 |
| Tricyclo[4.4.0.0(2,7)]dec-8-ene-3-methanol, .alpha.,.alpha.,6,8-tetramethyl-, stereoisomer                                  | 15.208 | 0.11 | 0.00 | 0.00 | 0.12  | 0.22 | 0.28 |
| Cyclohexanemethanol, 4-ethenyl-.alpha.,.alpha.,4-trimethyl-3-(1-methylethenyl)-, [1R-(1.alpha.,3.alpha.,4.alpha.,4.beta.)]- | 15.742 | 0.15 | 0.33 | 0.25 | 0.22  | 0.48 | 0.56 |
| 6-(1-Hydroxymethylvinyl)-4,8a-dimethyl-3,5,6,7,8,8a-hexahydro-1H-naphthalen-2-one                                           | 16.433 | 0.00 | 0.00 | 0.00 | 0.00  | 0.00 | 0.00 |
| epi-.alpha.-Patchoulene                                                                                                     | 17.108 | 0.00 | 0.00 | 0.00 | 0.00  | 0.68 | 0.73 |
| Germacre-1(10),4,11(13)-trien-12-oic acid, 6.alpha.-hydroxy-, .gamma.-lactone, (E,E)-                                       | 17.567 | 0.00 | 0.11 | 0.12 | 0.11  | 0.00 | 0.00 |
| 6-(1-Hydroxymethylvinyl)-4,8a-dimethyl-3,5,6,7,8,8a-hexahydro-1H-naphthalen-2-one                                           | 18.133 | 0.00 | 0.00 | 0.00 | 0.30  | 0.35 | 0.00 |
| 2-Iodophenyl-.beta.-phenylpropionate                                                                                        | 20.425 | 0.17 | 0.24 | 0.00 | 0.00  | 0.00 | 0.00 |
| TOTAL                                                                                                                       |        | 1.03 | 1.52 | 0.92 | 1.36  | 4.24 | 3.88 |
|                                                                                                                             |        |      |      |      | 14.48 |      |      |

### Chromones

| Compound name                                                                            | RT     | L1   | L2   | L3   | L4    | L5   | L6   |
|------------------------------------------------------------------------------------------|--------|------|------|------|-------|------|------|
| 4H-1-Benzopyran-4-one, 2-methyl-                                                         | 10.9   | 0.06 | 0.07 | 0.06 | 0.09  | 0.13 | 0.00 |
| 6-Methoxy-3-methyl-2-benzofuran-carbaldehyde                                             | 20.742 | 0.00 | 0.00 | 0.00 | 0.00  | 0.00 | 0.00 |
| 2-Hydroxy-4-methoxy-7-methyl-7,8,9,10,11,12,13,14-octahydro-6-oxabenzocyclododecen-5-one | 22.817 | 0.00 | 0.05 | 0.00 | 0.00  | 0.00 | 0.32 |
| 7H-Furo[3,2-g][1]benzopyran-7-one, 9-[(3-methyl-2-butenyl)oxy]-                          | 23.483 | 0.00 | 0.00 | 0.00 | 0.00  | 0.00 | 0.00 |
| 6-Methoxy-2-phenethyl-4H-chromen-4-one                                                   | 24.017 | 0.00 | 0.00 | 1.53 | 1.51  | 1.98 | 1.27 |
| Coumarin, 6-benzoyloxy-3,4-dihydro-4,4-dimethyl-                                         | 24.375 | 2.68 | 1.90 | 0.42 | 3.40  | 1.29 | 1.00 |
| 4H-1-Benzopyran-4-one, 5-hydroxy-7-methoxy-2-(4-methoxyphenyl)-                          | 26.35  | 0.00 | 0.00 | 0.00 | 0.00  | 0.00 | 0.00 |
| TOTAL                                                                                    |        | 2.74 | 2.03 | 2.02 | 5.00  | 3.40 | 2.59 |
|                                                                                          |        |      |      |      | 19.89 |      |      |

### Alkaloids

| Compound name                                                                   | RT     | L1   | L2   | L3   | L4    | L5   | L6   |
|---------------------------------------------------------------------------------|--------|------|------|------|-------|------|------|
| DL-Proline, 5-oxo-, methyl ester                                                | 9.333  | 0.00 | 0.00 | 0.00 | 0.00  | 0.00 | 0.00 |
| 2,5-Dimethoxy-4-ethylamphetamine                                                | 11.158 | 0.00 | 0.00 | 0.00 | 0.05  | 0.10 | 0.00 |
| beta.-D-glucosyloxyazoxymethane                                                 | 17.283 | 0.00 | 0.00 | 0.00 | 0.00  | 1.83 | 1.79 |
| Oxalic acid, monoamide monohydrazide, N-benzyl-N''-(1-oxo-3-phenylprop-2-enyl)- | 17.667 | 0.00 | 0.00 | 0.00 | 0.00  | 0.00 | 0.44 |
| Pentanal, 2-[bis(phenylmethyl)amino]-4-methyl-                                  | 23.558 | 3.45 | 0.42 | 0.38 | 0.00  | 0.00 | 0.00 |
| Capsaicin                                                                       | 23.575 | 0.00 | 0.00 | 0.00 | 0.00  | 0.00 | 0.00 |
| Nonivamide                                                                      | 23.75  | 0.00 | 0.00 | 0.00 | 0.00  | 0.00 | 0.00 |
| 2,6-Lutidine-4-[benzylamino]-3,5-dichloro                                       | 23.967 | 2.59 | 1.73 | 0.00 | 0.00  | 0.00 | 0.74 |
| benzene-1,2-diol, 4-[2-nitroethenyl]-, 1-O-benzyl(ether)                        | 24.225 | 0.00 | 0.00 | 0.00 | 0.00  | 0.00 | 0.64 |
| Benzenepropanal, .alpha.-[bis(phenylmethyl)amino]-                              | 25.675 | 1.23 | 0.00 | 0.00 | 0.00  | 0.00 | 0.00 |
| TOTAL                                                                           |        | 7.27 | 2.15 | 0.38 | 0.05  | 1.93 | 3.60 |
|                                                                                 |        |      |      |      | 17.21 |      |      |

### Aromatic compounds

| Compound name                                             | RT     | L1   | L2   | L3   | L4    | L5   | L6   |
|-----------------------------------------------------------|--------|------|------|------|-------|------|------|
| Hexadecanoic acid, methyl ester                           | 16.017 | 0.14 | 0.21 | 0.19 | 0.34  | 0.55 | 0.70 |
| n-Hexadecanoic acid                                       | 16.575 | 0.00 | 0.00 | 0.00 | 0.00  | 1.33 | 1.58 |
| Ethyl 5,8,11,14,17-icosapentaenoate                       | 17.925 | 0.23 | 0.00 | 0.19 | 0.29  | 0.20 | 0.57 |
| 9,12-Octadecadienoic acid (Z,Z)-, methyl ester            | 18.283 | 0.00 | 0.00 | 0.24 | 0.28  | 0.00 | 0.80 |
| 11-Octadecenoic acid, methyl ester                        | 18.342 | 0.29 | 0.34 | 0.31 | 0.50  | 1.02 | 1.20 |
| Octadecanoic acid, methyl ester                           | 18.6   | 0.00 | 0.00 | 0.05 | 0.08  | 0.00 | 0.00 |
| Oleic Acid                                                | 18.767 | 0.00 | 0.00 | 0.00 | 0.00  | 0.39 | 0.43 |
| Hexadecanoic acid, 2-hydroxy-1-(hydroxymethyl)ethyl ester | 23.067 | 0.05 | 0.00 | 0.08 | 0.11  | 0.00 | 0.18 |
| 9-Octadecenoic acid (Z)-, 2,3-dihydroxypropyl ester       | 24.475 | 0.00 | 0.58 | 0.00 | 0.58  | 0.00 | 0.00 |
| TOTAL                                                     |        | 0.71 | 1.14 | 1.07 | 2.19  | 3.49 | 5.47 |
|                                                           |        |      |      |      | 15.72 |      |      |

## Aromatic compounds

| Compound name                                                              | RT     | L1    | L2   | L3   | L4   | L5   | L6   |
|----------------------------------------------------------------------------|--------|-------|------|------|------|------|------|
| Benzaldehyde                                                               | 4.592  | 0.22  | 0.31 | 0.30 | 0.28 | 0.51 | 0.70 |
| Hydrocinnamic acid                                                         | 8.908  | 0.00  | 0.11 | 0.00 | 0.00 | 0.41 | 0.48 |
| 2-Methoxy-4-vinylphenol                                                    | 8.767  | 0.00  | 0.00 | 0.00 | 0.00 | 0.00 | 0.00 |
| Phenol, 2,6-dimethoxy-                                                     | 9.125  | 0.00  | 0.00 | 0.00 | 0.00 | 0.00 | 0.00 |
| 2-Butanone, 4-(4-methoxyphenyl)-                                           | 10.558 | 0.05  | 0.08 | 0.05 | 0.06 | 0.15 | 0.21 |
| Phenol, 2,4-bis(1,1-dimethylethyl)-                                        | 10.617 | 0.09  | 0.00 | 0.00 | 0.08 | 0.12 | 0.19 |
| 2,4-Di-tert-butylphenol                                                    | 10.625 | 0.00  | 0.07 | 0.07 | 0.00 | 0.00 | 0.00 |
| Benzenepropanoic acid, 4-methoxy-, methyl ester                            | 10.808 | 0.04  | 0.00 | 0.00 | 0.00 | 0.00 | 0.00 |
| 3-tert-Butyl-4-hydroxyanisole, acetate                                     | 11.158 | 0.00  | 0.00 | 0.06 | 0.00 | 0.00 | 0.00 |
| Phenol, 3,4,5-trimethoxy-                                                  | 11.5   | 0.00  | 0.00 | 0.00 | 0.00 | 0.00 | 0.00 |
| Benzaldehyde, 4-hydroxy-3,5-dimethoxy-                                     | 12.167 | 0.00  | 0.00 | 0.00 | 0.00 | 0.00 | 0.00 |
| Benzenepropanoic acid, 3,5-bis(1,1-dimethylethyl)-4-hydroxy-, methyl ester | 16.442 | 0.00  | 0.00 | 0.00 | 0.00 | 0.00 | 0.00 |
| Naphthalene, 1,2,3,4-tetrahydro-1-nonyl-                                   | 17.642 | 0.00  | 0.00 | 0.00 | 0.00 | 0.37 | 0.00 |
| 1-Penten-3-one, 1,5-diphenyl-                                              | 19.292 | 0.17  | 0.00 | 0.31 | 0.23 | 0.79 | 0.00 |
| 2-Iodophenyl-.beta.-phenylpropionate                                       | 20.417 | 0.00  | 0.00 | 0.00 | 0.28 | 0.00 | 0.00 |
| 3-Pentanone, 1,5-diphenyl-                                                 | 20.433 | 0.00  | 0.00 | 0.34 | 0.00 | 0.63 | 0.69 |
| 8-Naphthol, 1-(benzyloxy)-                                                 | 21.558 | 0.00  | 0.00 | 0.00 | 0.00 | 0.00 | 1.01 |
| 1,2-Benzenedicarboxylic acid, diisooctyl ester                             | 23.425 | 0.00  | 0.00 | 0.00 | 0.00 | 0.00 | 0.34 |
| TOTAL                                                                      |        | 0.56  | 0.57 | 1.12 | 0.93 | 2.97 | 3.62 |
|                                                                            |        | 10.92 |      |      |      |      |      |

## Terpenoids

| Compound name                                                                                                     | RT     | L1   | L2   | L3   | L4   | L5   | L6   |
|-------------------------------------------------------------------------------------------------------------------|--------|------|------|------|------|------|------|
| 2-Butanone, 4-phenyl-                                                                                             | 8      | 0.29 | 0.49 | 0.40 | 0.37 | 0.83 | 1.13 |
| Benzenepropanoic acid, methyl ester                                                                               | 8.333  | 0.06 | 0.09 | 0.06 | 0.07 | 0.16 | 0.16 |
| Benzylmalonic acid                                                                                                | 8.9    | 0.07 | 0.00 | 0.00 | 0.10 | 0.00 | 0.00 |
| 3-(4-Methoxyphenyl)propionic acid                                                                                 | 11.258 | 0.00 | 0.00 | 0.00 | 0.00 | 0.15 | 0.18 |
| 4-((1E)-3-Hydroxy-1-propenyl)-2-methoxyphenol                                                                     | 13.117 | 0.27 | 0.25 | 0.15 | 0.26 | 0.52 | 0.80 |
| Androsta-1,4-dien-3-one, 17-hydroxy-17-methyl-, (17.alpha.)-                                                      | 14.3   | 0.00 | 0.00 | 0.00 | 0.00 | 0.24 | 0.23 |
| 1H-2,8a-Methanocyclopenta[a]cyclopropa[e]cyclodecen-11-one, 1a,2,5,5a,6,9,10,10a-octahydro-5,5a,6-trihydroxy-1,4- | 16.975 | 0.00 | 0.00 | 0.00 | 0.00 | 0.00 | 0.96 |
| TOTAL                                                                                                             |        | 0.69 | 0.83 | 0.60 | 0.80 | 1.89 | 3.46 |
|                                                                                                                   |        | 9.25 |      |      |      |      |      |

| Compound name                                                   | RT     | L1   | L2   | L3   | L4   | L5   | L6   |
|-----------------------------------------------------------------|--------|------|------|------|------|------|------|
| 2-Propanamine, N-methyl-N-nitroso-                              | 6.708  | 0.00 | 0.00 | 0.00 | 0.00 | 0.00 | 0.00 |
| 4H-Pyran-4-one, 2,3-dihydro-3,5-dihydroxy-6-methyl-             | 6.858  | 0.00 | 0.00 | 0.00 | 0.00 | 0.00 | 0.00 |
| 3-Hydroxy-2-methylglutaric acid dimethyl ester                  | 7.717  | 0.23 | 0.22 | 0.12 | 0.36 | 0.69 | 0.59 |
| 2-Pentene, 2,4,4-trimethyl-                                     | 9.2    | 0.00 | 0.00 | 0.00 | 0.00 | 0.00 | 0.00 |
| 1,3-Propanediol, 2-(hydroxymethyl)-2-nitro-                     | 10.117 | 0.00 | 0.00 | 0.00 | 0.00 | 0.00 | 0.00 |
| D-Allose                                                        | 10.367 | 0.10 | 0.11 | 0.08 | 0.13 | 0.00 | 0.00 |
| 7-Nonenamide                                                    | 10.517 | 0.00 | 0.00 | 0.00 | 0.00 | 0.00 | 0.00 |
| Santalol                                                        | 11.417 | 0.00 | 0.00 | 0.00 | 0.06 | 0.00 | 0.00 |
| alpha.-Farnesene                                                | 11.433 | 0.00 | 0.00 | 0.00 | 0.00 | 0.00 | 0.29 |
| 1,2,3,5-Cyclohexanetetrol, (1.alpha.,2.beta.,3.alpha.,5.beta.)- | 11.667 | 0.00 | 0.00 | 0.00 | 0.00 | 0.00 | 0.00 |
| Cyclooctasiloxane, hexadecamethyl                               | 12.075 | 0.00 | 0.00 | 0.00 | 0.00 | 0.00 | 0.00 |
| 1-(3-Methyl-cyclopent-2-enyl)-cyclohexene                       | 15.217 | 0.00 | 0.13 | 0.12 | 0.00 | 0.00 | 0.00 |

## Others
